# Supplementary material for: Cyano-B12 or Whey Powder with Endogenous Hydroxo-B12 for Supplementation in B12 Deficient Lactovegetarians
Source: PubMed Central journal article supplement (PMC6835307; doi:10.3390/nu11102382), 2019-10-06
Supplement: nutrients-11-02382-s001.pdf [file nutrients-11-02382-s001.pdf]

Supplementary material for:

## Cyano-B12 or whey powder with endogenous hydroxo-B12 for supplementation in B12 deficient lactovegetarians

Sadanand Naik <sup>1\*</sup>, Namita Mahalle <sup>1</sup>, Eva Greibe <sup>2</sup>, Marie S. Ostenfeld <sup>3</sup>, Christian W. Heegaard <sup>4</sup>, Ebba Nexø <sup>2</sup> and Sergey N. Fedosov <sup>4\*</sup>

<sup>1</sup> Department of Pathology, Deenanath Mangeshkar Hospital and Research Center, Pune, India; [pnmahalle@gmail.com](mailto:pnmahalle@gmail.com) (N.M.)

<sup>2</sup> Department of Clinical Biochemistry and Institute of Clinical Medicine, Aarhus University Hospital, DK-8200 Aarhus N, Denmark; [evagreibe@gmail.com](mailto:evagreibe@gmail.com) (E.G.); [ebbanexo@rm.dk](mailto:ebbanexo@rm.dk) (E.N.)

<sup>3</sup> Arla Foods Ingredients Group P/S, DK-8260 Viby, Denmark; [marie.stampe.ostenfeld@arlafoods.com](mailto:marie.stampe.ostenfeld@arlafoods.com) (M.S.O)

<sup>4</sup> Department of Molecular Biology and Genetics, Aarhus University, DK-8000 Aarhus C, Denmark; [cwh@mbg.au.dk](mailto:cwh@mbg.au.dk) (C.W.H)

\* Correspondence: [sadu\\_naik@rediffmail.com](mailto:sadu_naik@rediffmail.com) (S.N.); [snf@mbg.au.dk](mailto:snf@mbg.au.dk) (S.N.F.); Tel: +91 20 66023194 (S.N.); +45 87155521 (S.N.F.)

**Supplementary Table S1. Nutritional composition of whey powder (Lacprodan® DI-8290) as per manufacturer's<sup>a</sup> product specifications.**

| Composition | Amount (dry basis) |
|-------------|--------------------|
| Protein %   | 81,5               |
| Lactose %   | 2                  |
| Fat %       | 8                  |
| Ash %       | 2.2                |

<sup>a</sup>Lacprodan® DI-8290 was procured by Arla Foods Ingredients Group P/S, Viby, Denmark.

**Supplementary Table S2.** Fitting parameters of the markers, responding to the treatment with CN-B12 capsules, or whey powder.

| Treatment and $P_i$ number | CN-B12 capsules<br>fitting $P_i$ ( $p$ of reference value) |                                        | whey powder<br>fitting $P_i$ ( $p$ of reference value) |                                        |
|----------------------------|------------------------------------------------------------|----------------------------------------|--------------------------------------------------------|----------------------------------------|
| $\Delta B12$               | Equation 1                                                 |                                        |                                                        |                                        |
| $P_1 \pm SE_1$             | $0.0 \pm 18$                                               | (1.0)                                  | $0.0 \pm 4.1$                                          | 1.0                                    |
| $P_2 \pm SE_2$             | $97 \pm 20$                                                | $(7 \cdot 10^{-6})$                    | $47 \pm 13$                                            | 0.0003                                 |
| $P_3 \pm SE_3$             | $0.69 \pm 0.42$                                            | (0.1)                                  | $0.29 \pm 0.21$                                        | 0.17                                   |
| ( $p$ overall)             |                                                            | <b><math>(7 \cdot 10^{-8})</math></b>  |                                                        | <b><math>(5 \cdot 10^{-5})</math></b>  |
| $\Delta \text{holoTC}$     | Equation 2                                                 |                                        |                                                        |                                        |
| $P_1 \pm SE_1$             | $0.0 \pm 5.0$                                              | (1.0)                                  | $0.0 \pm 2.8$                                          | (1.0)                                  |
| $P_2 \pm SE_2$             | $60 \pm 10$                                                | $(9 \cdot 10^{-8})$                    | $38 \pm 6$                                             | $(3 \cdot 10^{-9})$                    |
| $P_3 \pm SE_3$             | $8.0 \pm 0.9$                                              | $(2 \cdot 10^{-13})$                   | $8.2 \pm 0.9$                                          | $(8 \cdot 10^{-16})$                   |
| ( $p$ overall)             |                                                            | <b><math>(2 \cdot 10^{-20})</math></b> |                                                        | <b><math>(3 \cdot 10^{-24})</math></b> |
| R(Hcy)                     | Equation 2                                                 |                                        |                                                        |                                        |
| $P_1 \pm SE_1$             | $1.00 \pm 0.04$                                            | (1.0)                                  | $1.00 \pm 0.02$                                        | (1.0)                                  |
| $P_2 \pm SE_2$             | $-0.38 \pm 0.09$                                           | $(4 \cdot 10^{-5})$                    | $-0.47 \pm 0.07$                                       | $(6 \cdot 10^{-9})$                    |
| $P_3 \pm SE_3$             | $9.4 \pm 1.6$                                              | $(9 \cdot 10^{-8})$                    | $6.8 \pm 0.7$                                          | $(1 \cdot 10^{-17})$                   |
| ( $p$ overall)             |                                                            | <b><math>(4 \cdot 10^{-12})</math></b> |                                                        | <b><math>(6 \cdot 10^{-26})</math></b> |
| R(MMA)                     | Equation 2                                                 |                                        |                                                        |                                        |
| $P_1 \pm SE_1$             | $1.00 \pm 0.06$                                            | (1.0)                                  | $1.00 \pm 0.05$                                        | (1.0)                                  |
| $P_2 \pm SE_2$             | $-0.67 \pm 0.12$                                           | $(1 \cdot 10^{-7})$                    | $-0.34 \pm 0.07$                                       | $(4 \cdot 10^{-6})$                    |
| $P_3 \pm SE_3$             | $8.2 \pm 1.0$                                              | $(4 \cdot 10^{-13})$                   | $6.4 \pm 1.1$                                          | $(1 \cdot 10^{-7})$                    |
| ( $p$ overall)             |                                                            | <b><math>(5 \cdot 10^{-20})</math></b> |                                                        | <b><math>(4 \cdot 10^{-13})</math></b> |

The bold figures for the overall probabilities highlight the high levels of significance for deviation from a “zero response”.
